# Supplementary material
Source: Research Square preprint supplement (doi:10.21203/rs.3.rs-9539298/v1)
Supplement: Supplementary file 1 [file 91fb49d607b04b534c0113d5.docx]

# **Additional file 2**

## STROBE Checklist

| **Item** | **Section / Subheading** | **Paragraph** | **Description** |
| --- | --- | --- | --- |
| 1a | Title | - | Study design is in title |
| 1b | Abstract | - | Structured abstract covering population, exposure, outcomes, key results, and conclusion |
| 2 | Introduction | 1-3 | Limitations of existing triage outcomes described; rationale for modification of LOSET explained |
| 3 | Introduction | 3 | Dual objectives stated: (1) modify LOSET for registry implementation; (2) compare mLOSET with commonly used triage outcomes |
| 4 | Methods / Study Design and Setting | 1-3 | Key elements of study design presented |
| 5 | Methods / Study Design and Setting | 1-3 | Setting, locations, and relevant dates described |
| 6a | Methods / Study Design and Setting | 3 | Eligibility criteria and sources and methods of participant selection described. No matching; 6b not applicable |
| 7 | Methods / LOSET Implementation | 1, 2 | Outcomes defined per mLOSET criteria |
| 7 | Methods / Statistical Analysis | all | Exposure, predictor, and comparison variables defined |
| 7 | Additional file 1, Table 3 | - | Standardised definitions for all 36 mLOSET outcomes including data source, timeframe, and codes |
| 8 | Methods / Study Design and Setting | 2 | Data sources described for cohort |
| 8 | Methods / LOSET Implementation | 2 | Data sources and assessment methods described per criterion |
| 8 | Additional file 1, Table 3 | - | Detailed implementation specifications per outcome |
| 9 | Methods / Statistical Analysis | 2 | Circular validation addressed by excluding death and ICU criteria from analyses predicting those same outcomes |
| 9 | Discussion / Limitations | 1 | Timing mismatch between discharge diagnoses and ED presentation acknowledged and addressed empirically |
| 10 | Methods / Study Design and Setting | 4 | No formal sample size calculation performed; complete SEM cohort used |
| 10 | Discussion / Limitations | 1 | Fuller justification of cohort size and adequacy for subgroup analyses |
| 11 | Methods / Statistical Analysis | 2-4 | Handling of quantitative variables described |
| 12a | Methods / Statistical Analysis | all | Risk ratios calculated using the delta method with 99% confidence intervals |
| 12b | Methods / Statistical Analysis | 3 | Subgroup analyses by sex, age group, and hospital volume described; pre-specified status clarified |
| 12c | Methods / Study Design and Setting | 3 | 2 visits excluded due to missing sex data; no other missing data for any primary analysis variable |
| 12d | - | - | Not applicable; fixed time-window outcomes, no active follow-up |
| 12e | - | - | No sensitivity analyses; not required for this study type |
| 13a | Methods / Study Design and Setting  Results / Systematic modification of LOSET to mLOSET | 1  5 | 624 911 total ED visits; 2 excluded due to missing sex data; 624 909 included in analysis |
| 13b | Results / Systematic modification of LOSET to mLOSET | 5 | Reason for exclusion stated (missing sex data) |
| 13c | - | - | Flow diagram not included; numbers fully reported in text. |
| 14a | Additional file 1/ Table 1 | - | Baseline characteristics reported for analysis; Full baseline is reported in the original SEM cohort paper |
| 14b | Results / Systematic modification of LOSET to mLOSET | 5 | Missing data reported: 2 visits excluded for sex; no known missing data for other variables |
| 14c | - | - | Not applicable; no active follow-up |
| 15 | Results / Systematic modification of LOSET to mLOSET | 5 | mLOSET-positive visits (34 219; 5.5%) and outcome event counts reported |
| 16 | Results / Association between mLOSET status and short-term severe outcomes | all | Risk ratios with 99% CI reported for all main comparisons |
| 16 | Results / Tables 1–3 | - | Main results with precision presented |
| 17 | Additional file 1, Tables 1–2 | - | Subgroup analyses and per-criterion risk ratios reported |
| 18 | Discussion | 1 | Key results summarised with reference to both study objectives |
| 19 | Limitations | all | Limitations discussed including timing mismatch, single-region data, and construct validation approach |
| 20 | Discussion | all | Cautious interpretation maintained throughout; results contextualised against existing evidence |
| 20 | Conclusions | all | Overall interpretation qualified appropriately |
| 21 | Discussion / Limitations | all | Generalisability discussed in context of Swedish registry data and single-region cohort |
| 22 | Declarations / Funding | - | Funding source and role of funders stated |
